# Supplementary material for: Iridium(III) and Rhodium(III) Half-Sandwich Coordination Compounds with 11H-Indeno[1,2-b]quinoxalin-11-one Oxime: A Case of Spontaneous Resolution of Rh(III) Complex
Source: MDPI journal article supplement (doi:10.3390/inorganics10110179), 2022-10-25
Supplement: s1 [file s1]

## Supplementary Materials

### Iridium(III) and rhodium(III) half-sandwich coordination compounds with 11*H*-indeno[1,2-*b*]quinoxalin-11-one oxime: a case of spontaneous resolution of Rh(III) complex

Vladislava V. Matveevskaya <sup>1</sup>, Dmitry I. Pavlov <sup>1</sup> and Andrei S. Potapov <sup>1,\*</sup>

<sup>1</sup> Nikolaev Institute of Inorganic Chemistry, 3 Lavrentiev Ave., 630090 Novosibirsk, Russia

\* Correspondence: potapov@niic.nsc.ru; Tel.: +7(383)330-92-56

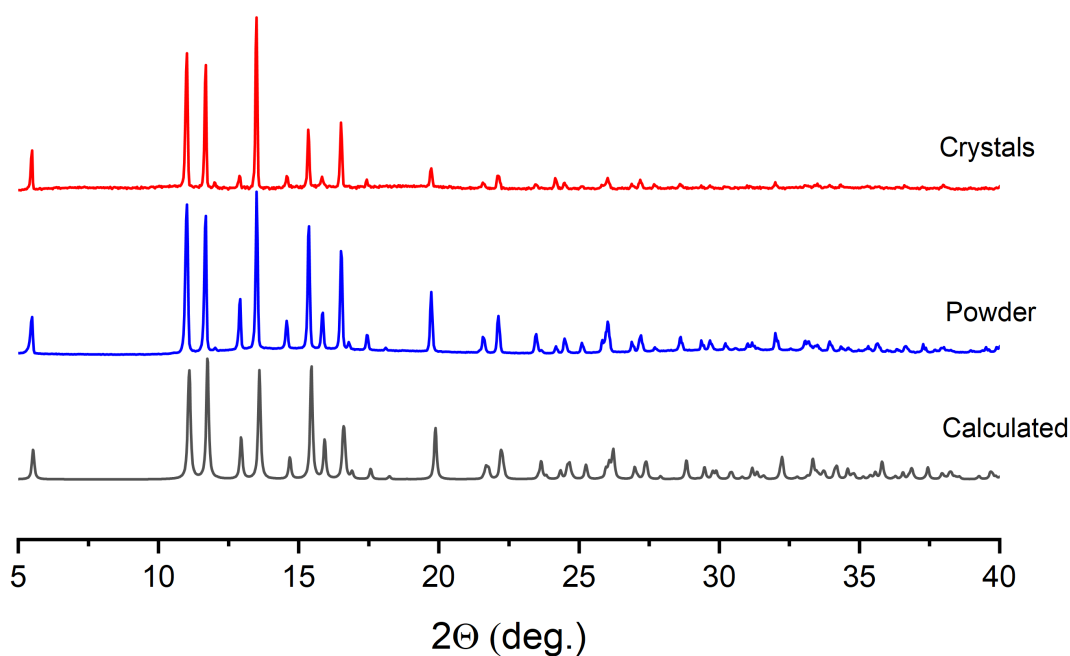

**Figure S1.** Experimental and calculated PXRD patterns for complex 1.

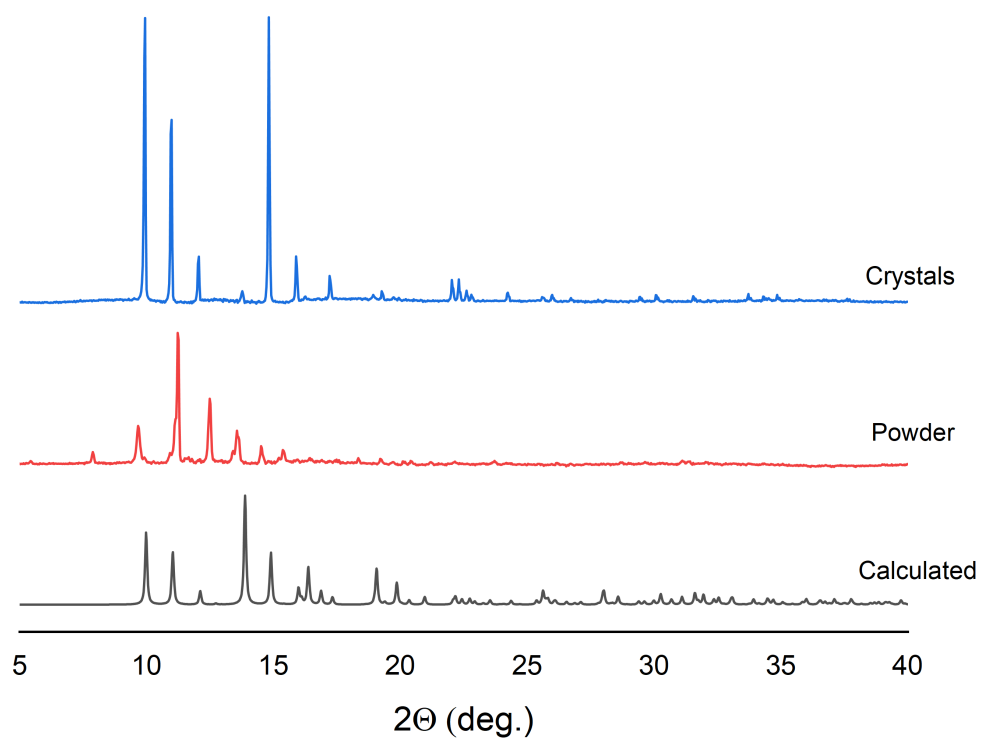

**Figure S2.** Experimental and calculated PXRD patterns for complex 2.

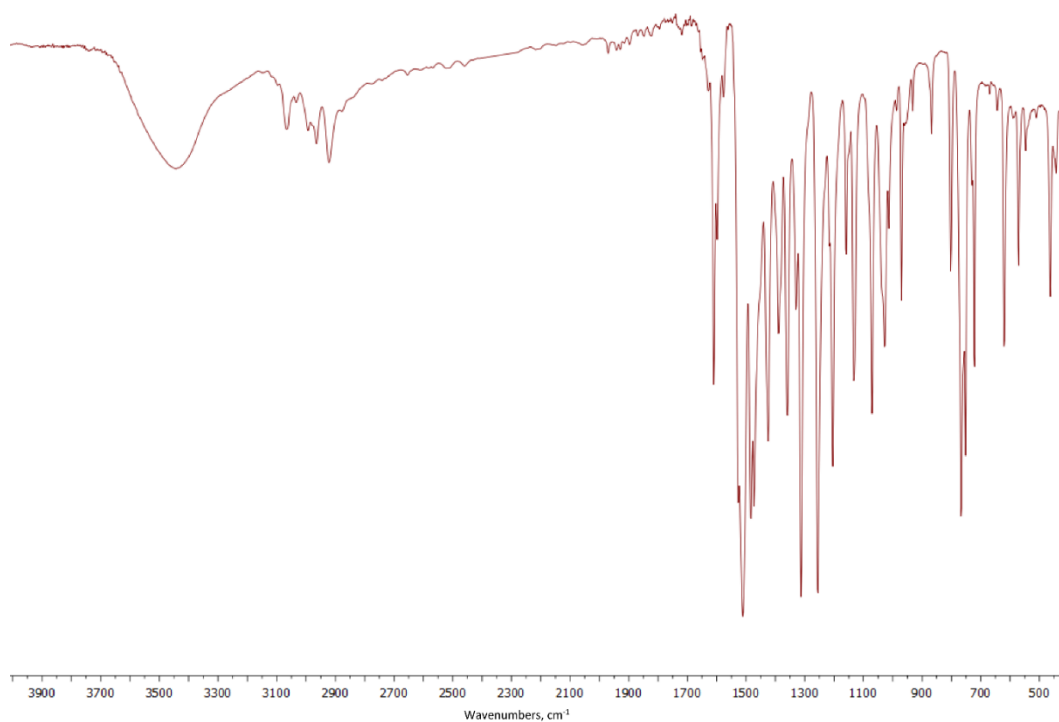

**Figure S3.** FT-IR spectrum of complex 1.

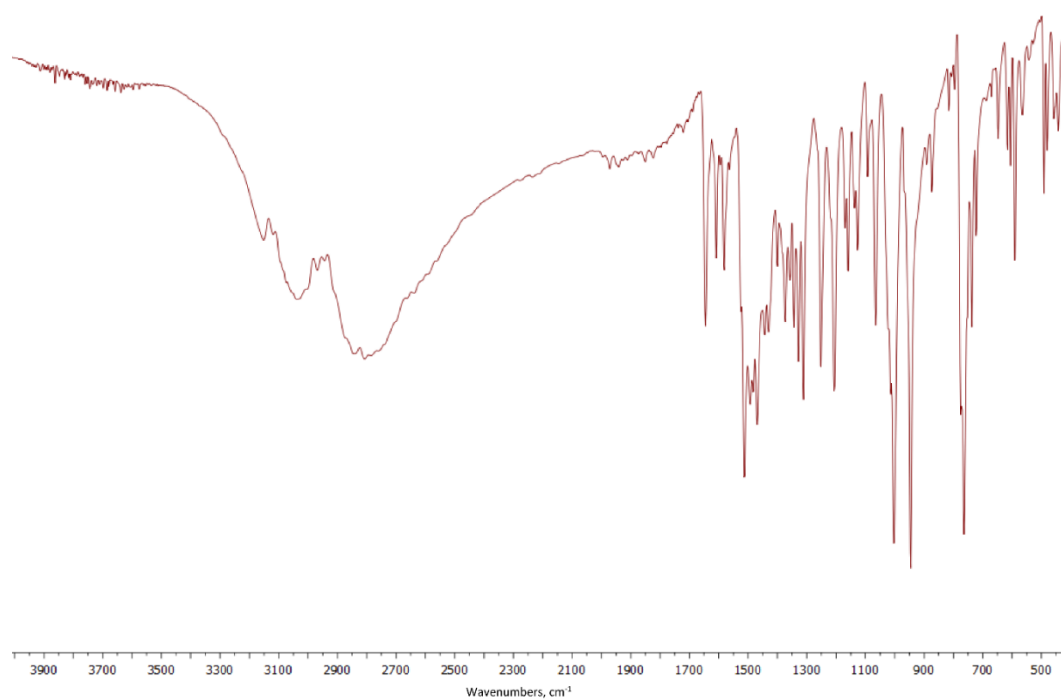

**Figure S4.** FT-IR spectrum of complex **2**.

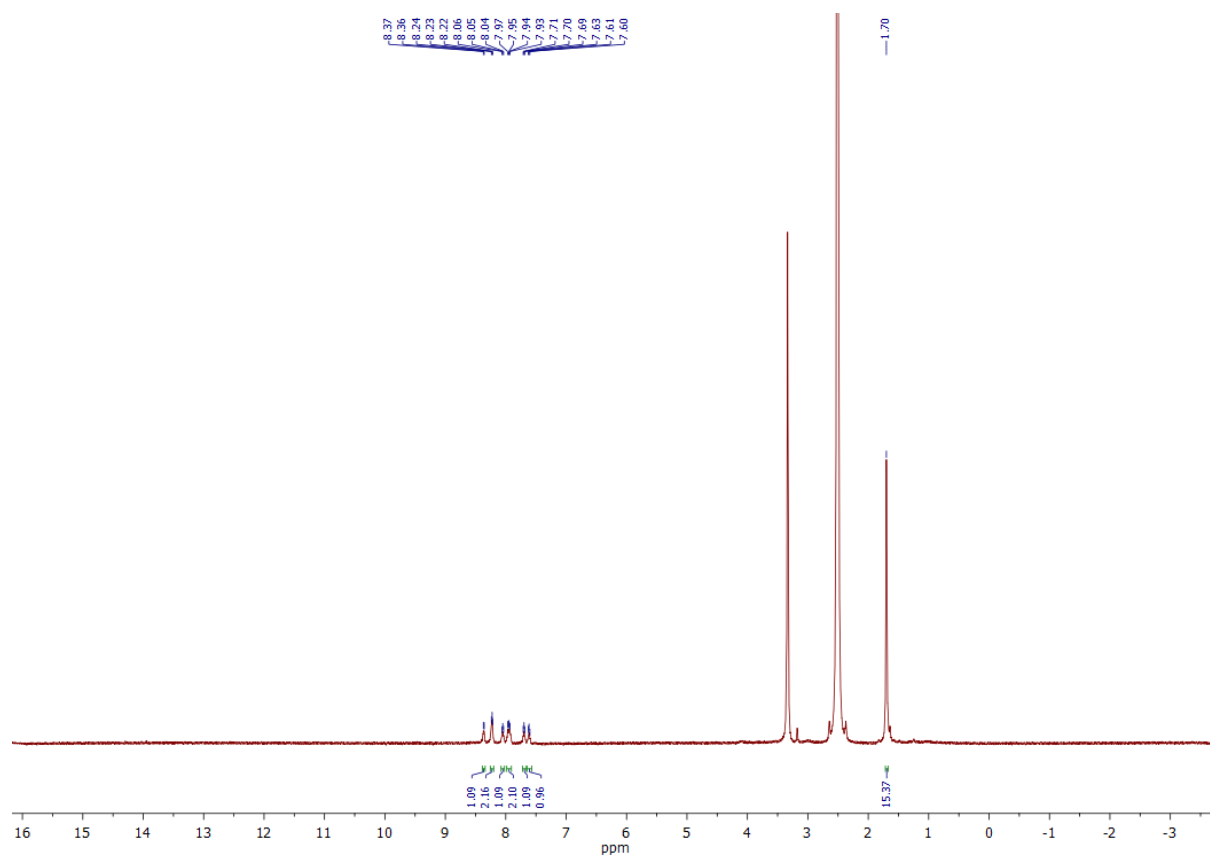

**Figure S5.** <sup>1</sup>H NMR spectrum of complex **1** in DMSO-d<sub>6</sub> at 500 MHz.

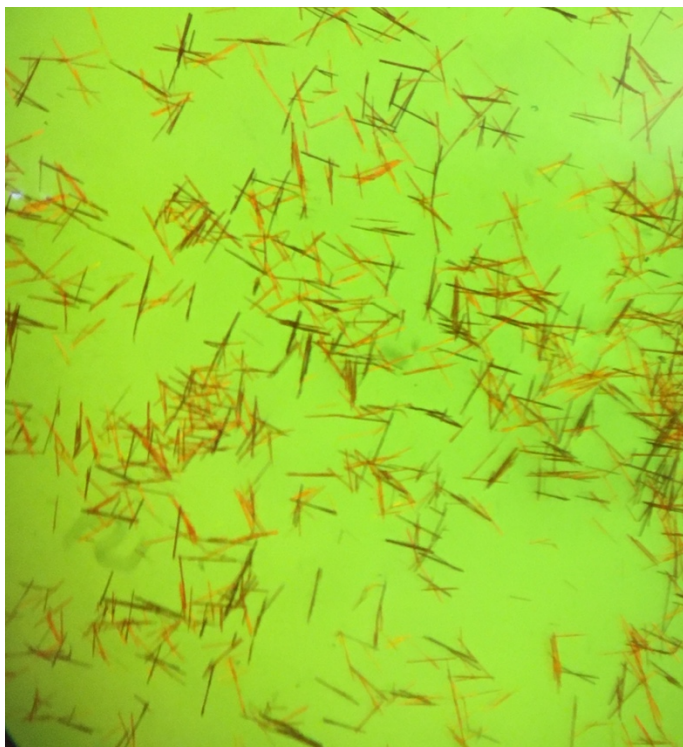

**Figure S6.** Photograph of the single crystals of compound **2** in the passing polarized light. Crystals of the individual enantiomers appear darker or lighter as a result of polarization plane rotation.
